# Supplementary figures and images for: Hybrid Versus Autochthonous Turkey Populations: Homozygous Genomic Regions Occurrences Due to Artificial and Natural Selection
Source: MDPI journal article supplement (doi:10.3390/ani10081318), 2020-07-30

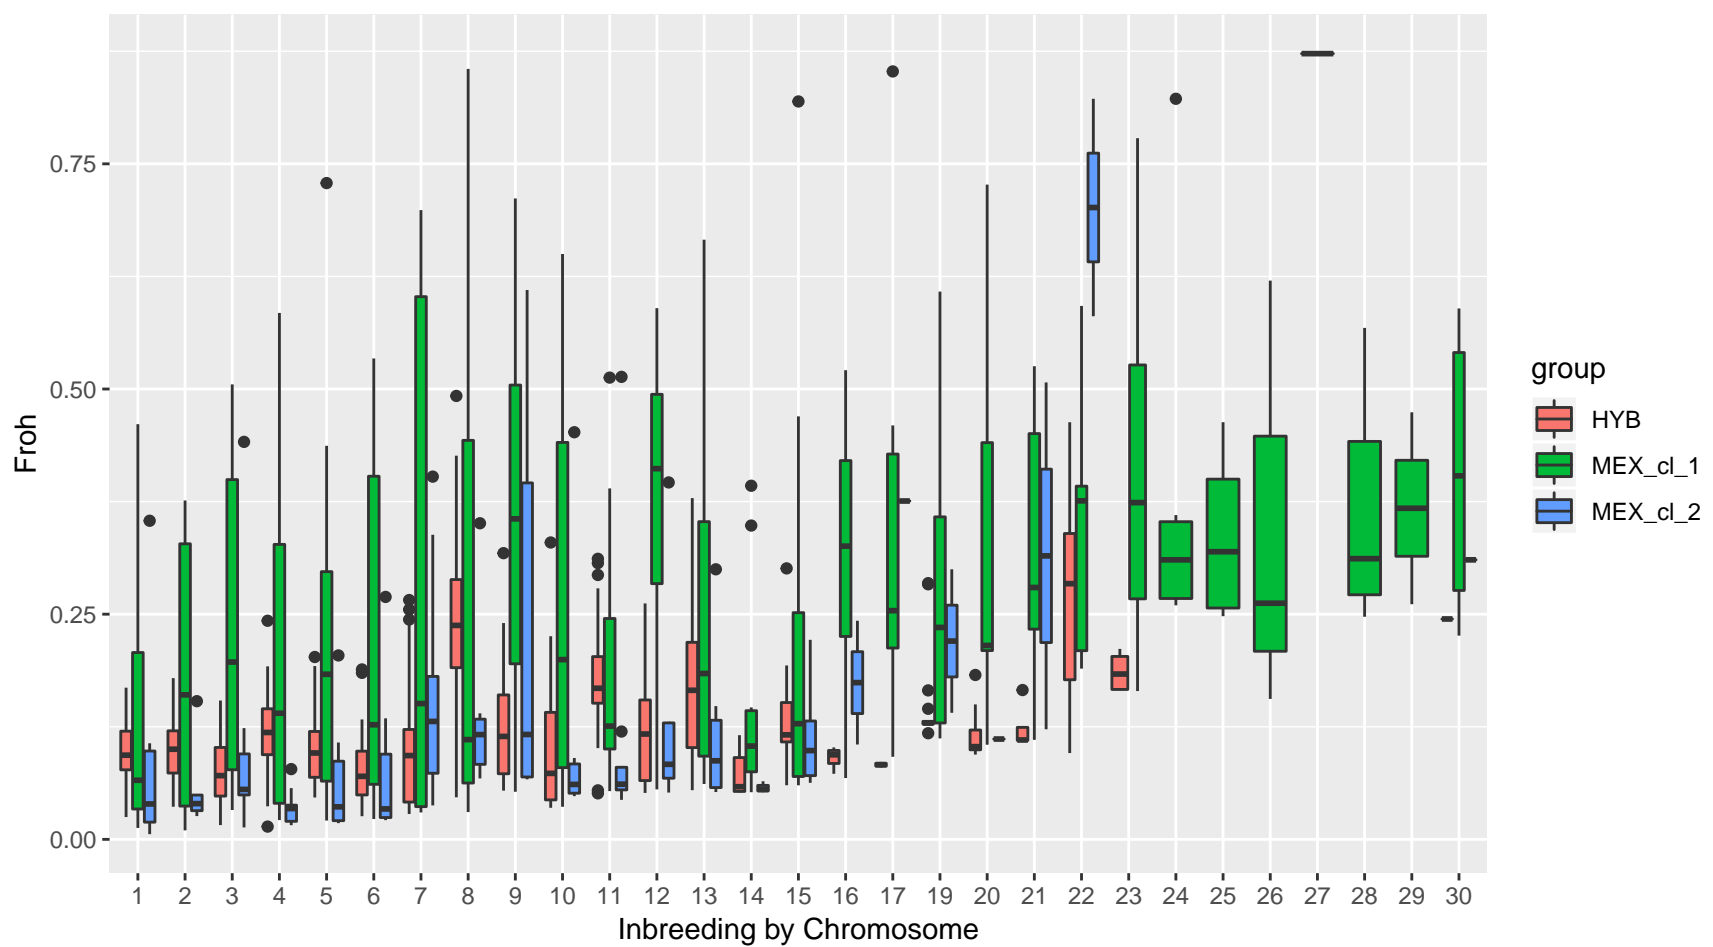

Supplement: s1 [file s1]
